# Supplementary material for: Transient protein accumulation at the center of the T cell antigen-presenting cell interface drives efficient IL-2 secretion
Source: eLife journal article supplement (doi:10.7554/elife.45789), 2019-10-24
Supplement: fig6-data1 [file elife-45789-fig6-data1-v2.pdf]

**Figure 6—figure supplement 1**

| Condition                        | Comparison              | Pattern     | -40          | -20            | 0              | 20             | 40             | 60             | 80             | 100            | 120           | 180            | 300            | 420   |
|----------------------------------|-------------------------|-------------|--------------|----------------|----------------|----------------|----------------|----------------|----------------|----------------|---------------|----------------|----------------|-------|
| Grb2 + LATV3, full stimulus      | Grb2, full stimulus     | any central |              |                | 0.01           | 0.000          | 0.003          | 0.001          | 0.000          | 0.02           |               | 0.003          |                |       |
| Grb2 + LATV3, Itk ko, full stim. | Grb2, Itk ko, full stim | any central |              | 0.03           |                |                | 0.04           |                | 0.02           | 0.03           | 0.01          |                | 0.009          |       |
| Grb2 + LATV3, anti-B7            | Grb2, anti-B7           | any central | 0.05         | 0.002<br>0.05  | 0.000          | 0.02           | 0.02           |                | 0.009          |                |               | 0.04           | 0.04           |       |
| Grb2 + LATV3, Itk ko, anti-B7    | Grb2, Itk ko, anti-B7   | any central |              |                | 0.03           | 0.003<br>0.001 | 0.000<br>0.000 | 0.001<br>0.001 | 0.000          | 0.000<br>0.007 | 0.000         | 0.000<br>0.008 | 0.001          | 0.01  |
| Lck + LATV3, full stimulus       | Lck, full stimulus      | any central |              | 0.04<br>0.03   |                | 0.02<br>0.000  | 0.04<br>0.001  | 0.001<br>0.000 | 0.001<br>0.008 | 0.001<br>0.008 | 0.000<br>0.05 | 0.000          | 0.000<br>0.007 | 0.001 |
| Lck + LATV3, Itk ko, full stim.  | Lck, Itk ko, full stim  | any central |              |                |                | 0.02           | 0.000<br>0.007 | 0.001<br>0.003 | 0.04           | 0.02           |               |                |                | 0.02  |
| Lck + LATV3, anti-B7             | Lck, anti-B7            | any central | 0.05<br>0.05 |                |                | 0.03           |                |                |                |                |               |                |                |       |
| Vav1 + LATV3, full stimulus      | Vav1, full stimulus     | any central |              | 0.000<br>0.002 | 0.000<br>0.002 | 0.000<br>0.02  | 0.006          | 0.009          | 0.03           | 0.001          |               | 0.02           |                |       |
| Vav1 + LATV3, Itk ko, full stim. | Vav1, Itk ko, full stim | any central |              |                |                |                |                |                |                |                |               |                |                |       |
| Vav1 + LATV3, anti-B7            | Vav1, anti-B7           | any central |              | 0.000<br>0.01  | 0.02           | 0.02           | 0.05           | 0.03           | 0.03           |                |               |                |                |       |
