# Supplementary material for: Transient protein accumulation at the center of the T cell antigen-presenting cell interface drives efficient IL-2 secretion
Source: eLife journal article supplement (doi:10.7554/elife.45789), 2019-10-24
Supplement: fig7-data1 [file elife-45789-fig7-data1-v2.pdf]

## Figure 7–figure supplement 1

To Figure 7 panel B, left column

| Condition                  | Comparison            | Pattern     | -40 | -20  | 0             | 20             | 40             | 60             | 80            | 100           | 120           | 180   | 300 | 420  |
|----------------------------|-----------------------|-------------|-----|------|---------------|----------------|----------------|----------------|---------------|---------------|---------------|-------|-----|------|
| SLP-76, anti-B7            | SLP-76, full stimulus | any central |     |      | 0.01          | 0.005<br>0.005 | 0.000<br>0.02  | 0.000<br>0.005 | 0.000         | 0.000         | 0.001         | 0.002 |     | 0.01 |
| SLP-76, Itk ko, full stim. | SLP-76, full stimulus | any central |     | 0.05 | 0.000         | 0.001<br>0.002 | 0.000<br>0.002 | 0.003<br>0.003 | 0.000<br>0.04 | 0.000<br>0.04 | 0.000<br>0.05 | 0.006 |     |      |
| SLP-76, Itk ko, anti-B7    | SLP-76, full stimulus | any central |     |      | 0.03<br>0.000 | 0.003<br>0.006 | 0.001          | 0.001          | 0.008         | 0.003<br>0.04 |               |       |     |      |

To Figure 7 panel B, middle and right columns

### SLP-76 V3

| Condition                                  | Comparison                    | Pattern     | -40  | -20           | 0              | 20    | 40            | 60    | 80    | 100           | 120   | 180   | 300   | 420   |
|--------------------------------------------|-------------------------------|-------------|------|---------------|----------------|-------|---------------|-------|-------|---------------|-------|-------|-------|-------|
| <b>Restoration to SLP-76 full stimulus</b> |                               |             |      |               |                |       |               |       |       |               |       |       |       |       |
| SLP-76 V3, full stimulus                   | SLP-76, full stimulus         | any central |      | 0.04          |                | 0.03  |               |       |       |               |       |       |       |       |
| SLP-76 V3, Itk ko, full stimulus           | SLP-76, full stimulus         | any central | 0.01 | 0.000<br>0.03 | 0.01<br>0.03   | 0.04  | 0.02          |       |       |               | 0.05  |       | 0.03  | 0.003 |
| SLP-76 V3, anti-B7                         | SLP-76, full stimulus         | any central |      |               |                |       |               |       | 0.000 | 0.000<br>0.05 | 0.000 | 0.005 |       |       |
| SLP-76 V3, Itk ko anti-B7                  | SLP-76, full stimulus         | any central |      |               | 0.02           |       | 0.03<br>0.04  | 0.05  | 0.000 | 0.001         |       | 0.02  |       |       |
| <b>Enhancement under matched stimuli</b>   |                               |             |      |               |                |       |               |       |       |               |       |       |       |       |
| SLP-76 V3, Itk ko, full stimulus           | SLP-76, Itk ko, full stimulus | any central |      | 0.000         | 0.000          | 0.000 | 0.000<br>0.05 | 0.000 | 0.000 | 0.000         | 0.000 | 0.000 | 0.001 | 0.000 |
| SLP-76 V3, anti-B7                         | SLP-76, anti-B7               | any central |      |               | 0.008<br>0.002 | 0.008 | 0.005<br>0.03 |       |       |               | 0.02  |       |       |       |
| SLP-76 V3, Itk ko anti-B7                  | SLP-76, Itk ko, anti-B7       | any central | 0.05 |               |                | 0.03  | 0.004         |       |       |               |       |       |       |       |

### SLP-76 Vav

| Condition                                  | Comparison                    | Pattern     | -40  | -20          | 0              | 20             | 40            | 60    | 80            | 100          | 120   | 180   | 300  | 420  |
|--------------------------------------------|-------------------------------|-------------|------|--------------|----------------|----------------|---------------|-------|---------------|--------------|-------|-------|------|------|
| <b>Restoration to SLP-76 full stimulus</b> |                               |             |      |              |                |                |               |       |               |              |       |       |      |      |
| SLP-76 Vav, full stimulus                  | SLP-76, full stimulus         | any central |      |              |                |                |               |       |               |              |       |       |      |      |
| SLP-76 Vav, Itk ko, full stimulus          | SLP-76, full stimulus         | any central |      | 0.03<br>0.02 |                |                | 0.04          | 0.03  | 0.01<br>0.006 | 0.02<br>0.05 |       |       |      |      |
| SLP-76 Vav, anti-B7                        | SLP-76, full stimulus         | any central |      |              | 0.01<br>0.04   | 0.006          | 0.04          | 0.003 | 0.000         | 0.000        | 0.001 | 0.000 |      | 0.03 |
| SLP-76 Vav, Itk ko anti-B7                 | SLP-76, full stimulus         | any central |      | 0.03<br>0.02 |                |                | 0.04          | 0.03  | 0.01<br>0.006 | 0.02<br>0.05 |       |       |      |      |
| <b>Enhancement under matched stimuli</b>   |                               |             |      |              |                |                |               |       |               |              |       |       |      |      |
| SLP-76 Vav, Itk ko, full stimulus          | SLP-76, Itk ko, full stimulus | any central |      |              | 0.003          |                | 0.02<br>0.007 | 0.03  | 0.006         | 0.004        | 0.04  |       | 0.02 |      |
| SLP-76 Vav, anti-B7                        | SLP-76, anti-B7               | any central |      |              | 0.000<br>0.000 | 0.001<br>0.000 | 0.02          | 0.01  |               |              |       |       |      |      |
| SLP-76 Vav, Itk ko anti-B7                 | SLP-76, Itk ko, anti-B7       | any central | 0.05 |              | 0.007<br>0.02  | 0.02<br>0.02   | 0.03          | 0.01  |               |              | 0.05  |       |      |      |
